# Supplementary material
Source: MDPI journal article supplement (https://www.mdpi.com/2227-7102/8/4/187)
Supplement: s1 [file s1]

## Supplementary Materials

### Individual response behavior of all students

AT = Austrian student; IN = Indian student; f = Female; m = Male.

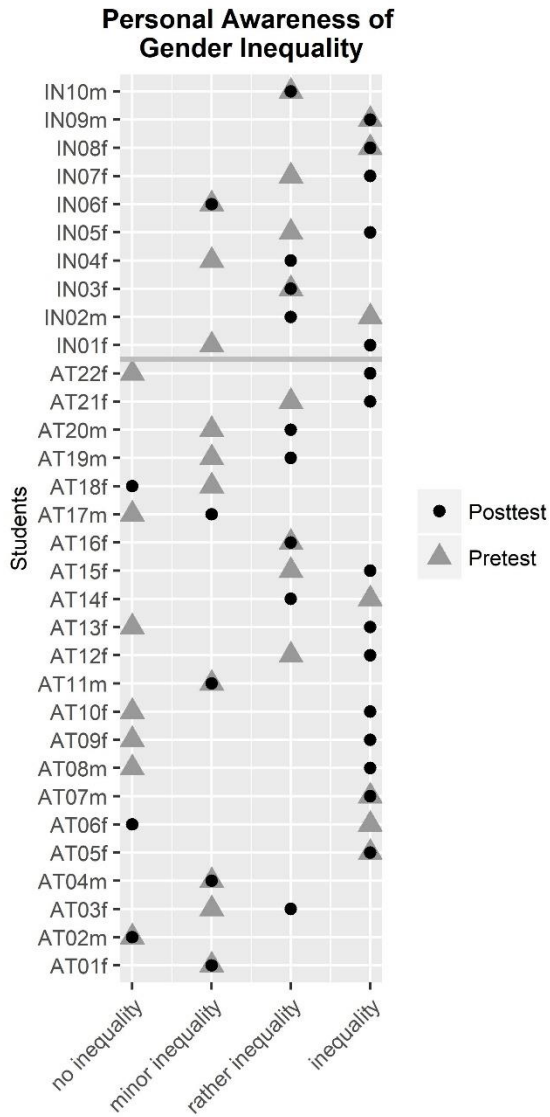

Figure S1. Individual response behavior of all students concerning the guiding question: 'What personal experiences have you had within your family, your circle of friends, and in your personal environment regarding issues of gender inequality?'

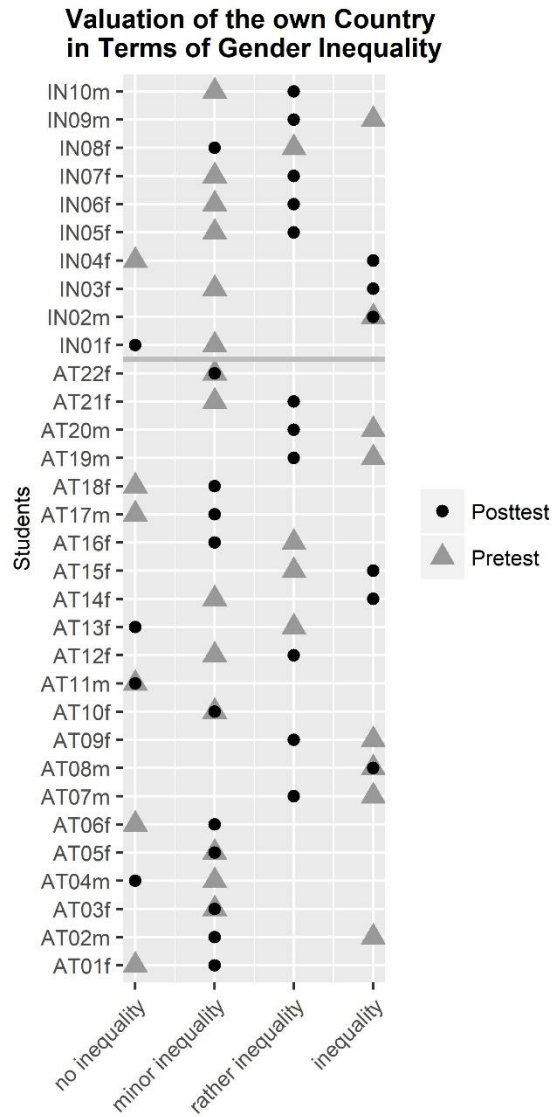

Figure S2. Individual response behavior of all students concerning the guiding question: 'How do you evaluate the situation in your own country in general regarding issues of gender inequality?'

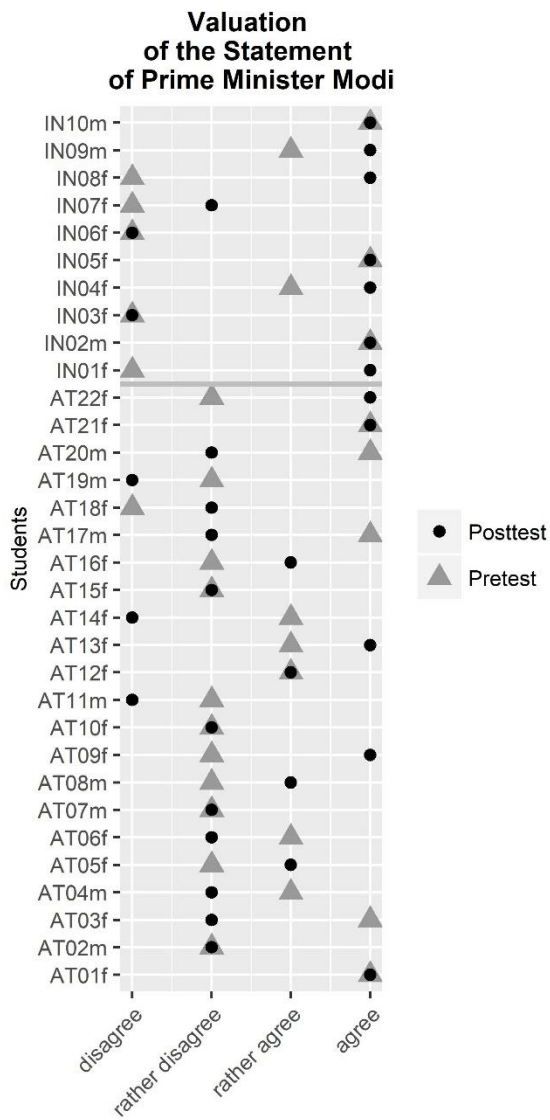

Figure S3. Individual response behavior of all students concerning the guiding question: 'In his speech alongside the climate conference in Paris 2015 the Indian Prime Minister Modi stressed that the poor countries cannot be blamed for the actual climate change and their pursuit of economic development must not be neglected. How do **you personally** evaluate this statement?'

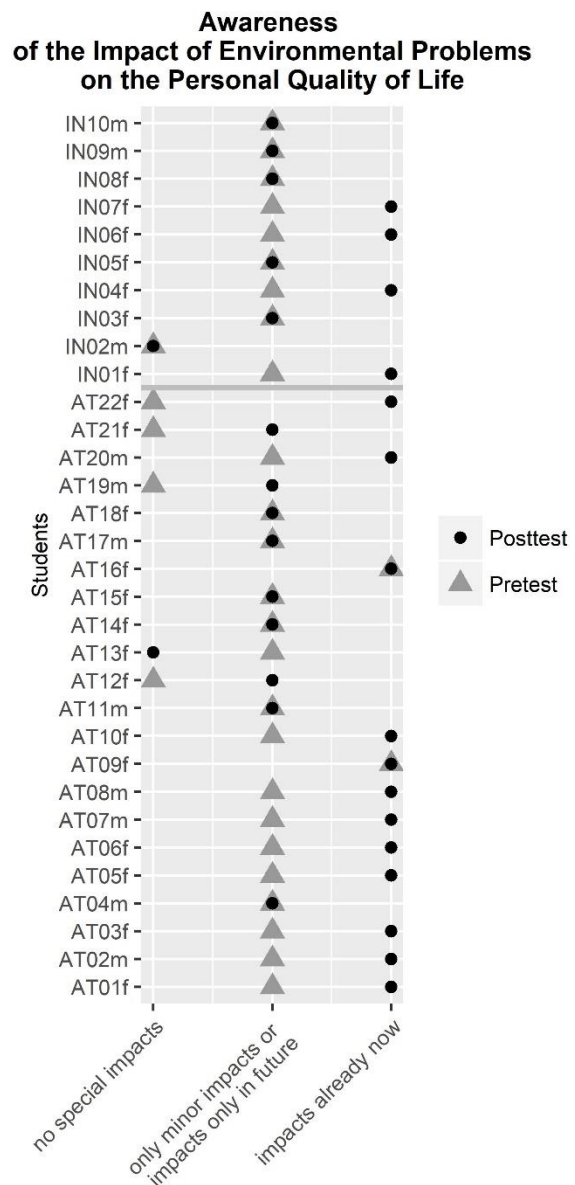

Figure S4. Individual response behavior of all students concerning the guiding question: 'Are there environmental problems due to economic development which have a **direct negative impact on your personal life?** If yes, specify the impact!'
